# Supplementary material for: New insights into exciton binding and relaxation from high time resolution ultrafast spectroscopy of CH3NH3PbI3and CH3NH3PbBr3films
Source: Royal Society of Chemistry journal article supplement (doi:10.1039/c5ta09643j), 2016-01-01
Supplement: c5ta09643j1.pdf [file c5ta09643j1.pdf]

## **ELECTRONIC SUPPLEMENTARY INFORMATION**

**New insights on exciton binding and relaxation from high time resolution ultrafast spectroscopy of  $\text{CH}_3\text{NH}_3\text{PbI}_3$  and  $\text{CH}_3\text{NH}_3\text{PbBr}_3$  films**

Vinay sharma<sup>a</sup>, Sigalit Aharon<sup>a</sup>, Itay Gdor<sup>a</sup>, Chunfan Yang<sup>a</sup>, Lioz Etgar<sup>a</sup>  
and Sanford Ruhman<sup>a\*</sup>

a. The Institute of chemistry, The Hebrew University of Jerusalem, Jerusalem 91904, Israel

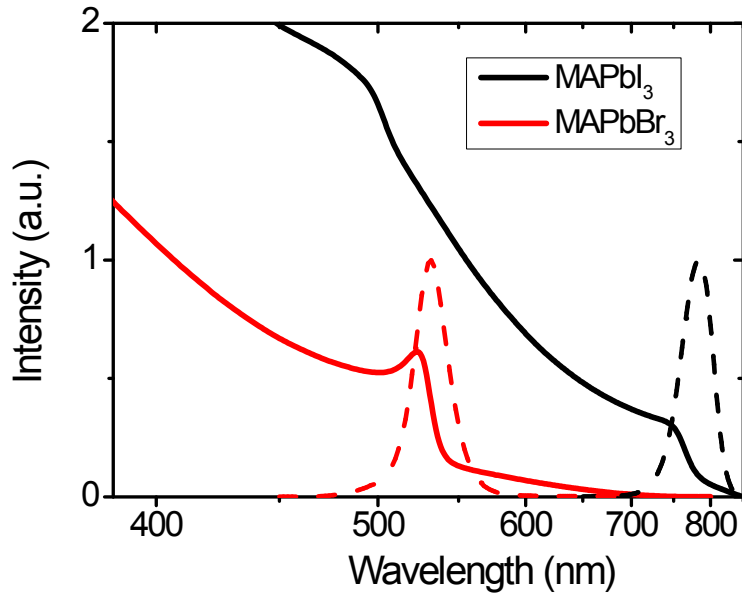

**Figure S1.** Absorption and photoluminescence of the two samples studied. (PL) was measured on an Edinburgh Instruments FLS920 fluorimeter equipped with a film holder. Samples were excited using Fianium SC400 laser output monochromatized at 405 nm (MAPbBr<sub>3</sub>) or at 500 nm (MAPbI<sub>3</sub>). The emission from

the sample was collected at a right angle, through long pass filter and a monochromator to suppress the scattering from excitation source, and collected using a Hamamatsu H10720 high speed PMT.

### SEM images

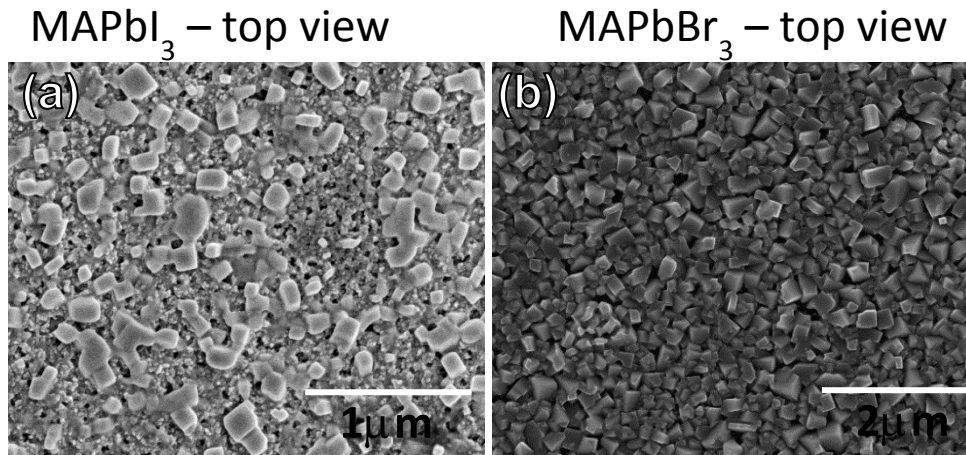

**Figure S2.** SEM images of the samples.
